# Supplementary material for: Can We Pay for Performance in Behavioral Health Care?
Source: Atypon-hosted journal article supplement (doi:10.1176/appi.ps.201600475), 2016-12-01
Supplement: appi.ps.201600475.ds001.pdf [file appi.ps.201600475.ds001.pdf]

## **Additional References**

Conrad DA, Perry L: Quality-based financial incentives in health care: can we improve quality by paying for it? *Annual Review of Public Health* 30: 357–371, 2009.

Eijkenaar F, Emmert M, Scheppach M, et al.: Effects of pay for performance in health care: a systematic review of systematic reviews. *Health Policy (Amsterdam, Netherlands)* 110: 115–130, 2013.

Glickman SW, Peterson ED: Innovative health reform models: pay-for-performance initiatives. *The American Journal of Managed Care* 15: S300-305, 2009.

Petersen LA: Does Pay-for-Performance Improve the Quality of Health Care? *Annals of Internal Medicine* 145: 265, 2006.

Scott A, Sivey P, Ait Ouakrim D, et al.: The effect of financial incentives on the quality of health care provided by primary care physicians. *The Cochrane Database of Systematic Reviews* CD008451, 2011.

Van Herck P, De Smedt D, Annemans L, et al.: Systematic review: Effects, design choices, and context of pay-for-performance in health care. *BMC health services research* 10: 247, 2010.

Bremer RW, Scholle SH, Keyser D, et al.: Pay for performance in behavioral health. *Psychiatric Services (Washington, D.C.)* 59: 1419–1429, 2008.
